# Supplementary figures and images for: ADVISING score: a reliable grading scale based on injury and response for intracerebral haemorrhage
Source: HighWire-hosted journal article supplement (doi:10.1136/svn-2022-001707), 2022-09-21

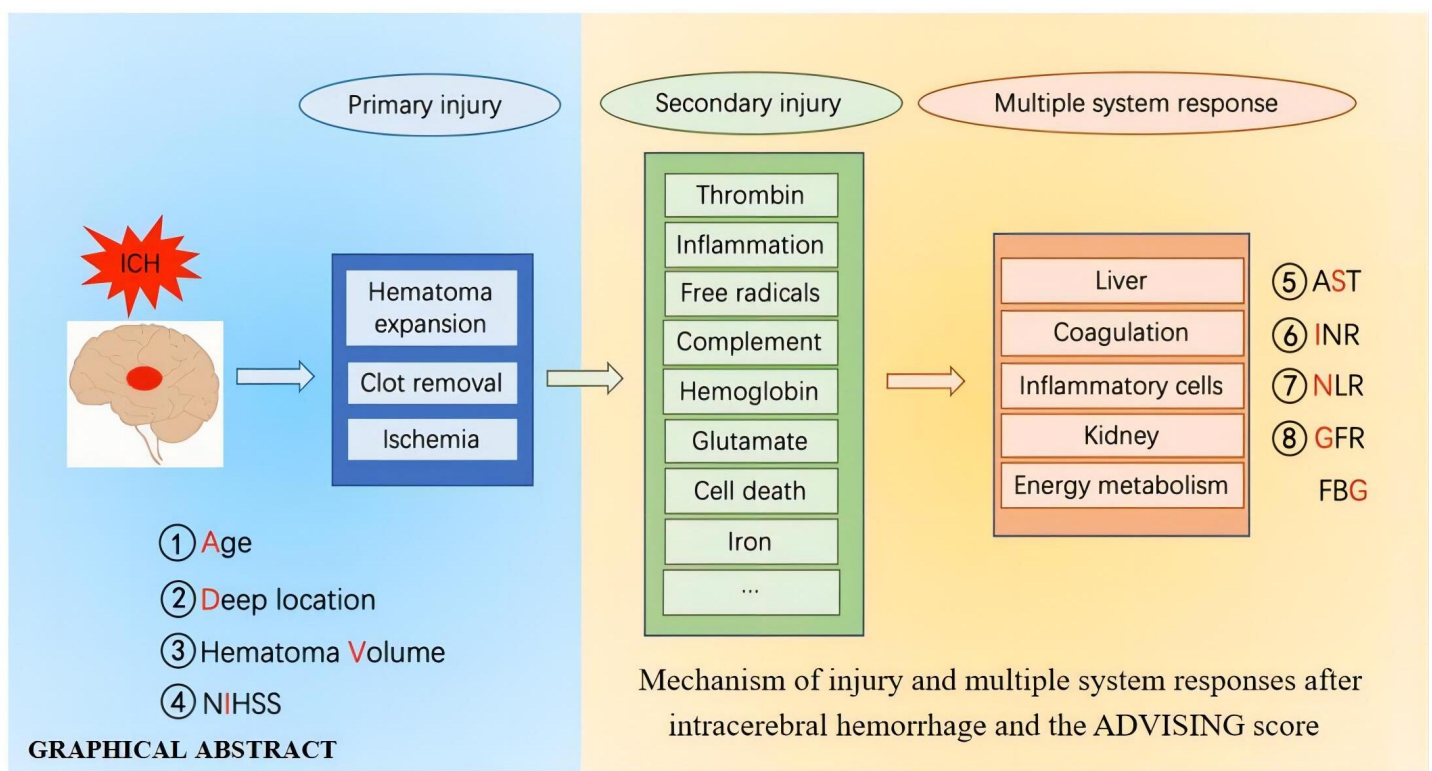

Supplement: svn-2022-001707supp002_data_supplement.pdf [file svn-2022-001707supp002_data_supplement.pdf]
